# Supplementary material
Source: PubMed Central journal article supplement (PMC2640832)
Supplement: NIHMS86256-supplement-1_si_001.pdf [file NIHMS86256-supplement-1_si_001.pdf]

## Supporting Information

### <sup>13</sup>C-Sialic Acid Labeling of Glycans on Glycoproteins Using ST6Gal-I

Megan A. Macnaughtan, Fang Tian, Shan Liu, Lu Meng, Seongha Park, Parastoo Azadi, Kelley W. Moremen, and James H. Prestegard\*

*Complex Carbohydrate Research Center, University of Georgia, 315 Riverbend Road, Athens, Georgia 30602*

#### Complete Reference 7a

Hamilton, S. R.; Davidson, R. C.; Sethuraman, N.; Nett, J. H.; Jiang, Y.; Rios, S.; Bobrowicz, P.; Stadheim, T. A.; Li, H.; Choi, B. K.; Hopkins, D.; Wischniewski, H.; Roser, J.; Mitchell, T.; Strawbridge, R. R.; Hoopes, J.; Wildt, S.; Gerngross, T. U. *Science* **2006**, *313*, 1441-3.

#### Synthesis of <sup>13</sup>C-[1,2,3,10,11]-CMP-β-NeuAc

<sup>13</sup>C-CMP-NeuAc was made in a four-step synthesis process following published procedures. *N*-hydroxysuccinimide and <sup>13</sup>C-acetyl chloride were combined to produce *N*-<sup>13</sup>C-[1,2]-acetoxy-succinimide, which was further reacted with D-mannosamine to make *N*-<sup>13</sup>C[1,2]-acetyl-mannosamine (<sup>13</sup>C-ManNAc).<sup>1</sup> The crude <sup>13</sup>C-ManNAc was purified by ion exchange column (Dowex 50, H<sup>+</sup> form) and flash chromatography (Iatrobeads, CHCl<sub>3</sub>, CH<sub>3</sub>OH and H<sub>2</sub>O 65:35:5). The enzyme, NeuAc aldolase, was then used to react <sup>13</sup>C-ManNAc with <sup>13</sup>C-pyruvate to produce <sup>13</sup>C-[1,2,3,10,11]-NeuAc.<sup>2</sup> <sup>13</sup>C-[1,2,3,10,11]-CMP-β-NeuAc was then synthesized using the enzyme, CMP-NeuAc synthetase, and cytidine-5'-triphosphophate to produce the final product.<sup>3</sup> <sup>13</sup>C-CMP-NeuAc was further purified by size exclusion chromatography on Bio-Gel P2 column (extra fine, water, 4°C) before use. The product was characterized by <sup>1</sup>H NMR spectroscopy. <sup>13</sup>C-CMP-NeuAc was lyophilized and stored at -20 °C and has been observed to be stable under these conditions for up to two years.

<sup>13</sup>C-CMP-NeuAc: <sup>1</sup>H NMR (500 MHz, D<sub>2</sub>O): δ 7.96 (d, 1 H, *J* = 6.5 Hz, H6 cytosine), 6.12 (d, 1 H, *J* = 6.0 Hz, H5 cytosine), 5.99 (d, 1 H, *J* = 4.0 Hz, H1 ribose), 4.34 – 4.16 (m, 5 H, H3 ribose, H2 ribose, H5 ribose, H4 ribose), 4.13 (d, 1H, *J* = 11.5 Hz, H6 NeuAc), 4.07 (m, 1H, H4 NeuAc), 3.96 – 3.88 (m, 2 H, H5 NeuAc, H8 NeuAc), 3.86 (dd, 1 H, *J* = 11.5 Hz, *J* = 4.0 Hz, H9 NeuAc), 3.62 (dd, 1 H, *J* = 11.5 Hz, *J* = 6.5 Hz, H9 NeuAc), 3.44 (d, 1 H, *J* = 10.0 Hz, H7 NeuAc), 2.62 (d, broad, 1H, *J* = 132.5 Hz, H3<sub>eq</sub> NeuAc), 2.15 (dd, 3H, *J* = 128.5 Hz, *J* = 6.0 Hz, NHCH<sub>3</sub>), 1.74 (d, broad, 1H, *J* = 125.5 Hz, H3<sub>ax</sub> NeuAc).

#### Structural characterization of ST6Gal-1 glycans

*Chemicals and Enzymes:* Peptide *N*-glycosidase F and α-1,6-Mannosidase (*Xanthomonas manihotis*) were purchased from New England BioLabs. Trypsin, α-2,3-Sialidase (Jack beans) and β-*N*-acetylhexosaminidase (Jack beans) were obtained from Sigma. Other fine chemicals were from standard sources.

*Composition analysis by GC-MS:* The neutral and amino sugar composition of ST6Gal-I was analyzed by GC-MS. Methyl glycosides were prepared from a dried sample by methanolysis (mild acid treatment) in 1 M HCl in methanol at 80°C (18 h), followed by *N*-acetylation with pyridine and acetic anhydride in methanol for detection of amino sugars. The sample then was *O*-per-trimethylsilylated (TMS) with Tri-Sil (Pierce) at 80°C (0.5 h). Inositol (~5 μg) was used as an internal standard. These procedures were carried out as described previously.<sup>4</sup>

*Release of N-linked glycans:* An aliquot of the sample was dried in a Speed Vac (Savant SC 110) and re-dissolved in ammonium bicarbonate buffer (50 mM, pH 8.4) and heated at 100°C for 5 min to denature the glycoprotein prior to trypsin digestion (37°C, overnight). A second enzyme, peptide *N*-glycosidase F (New England BioLabs) was added to the tryptic digest and incubated at 37°C overnight to release the *N*-linked glycans. After enzymatic digestions, the sample was passed

through a C18 reversed phase cartridge. The carbohydrate fraction was eluted with 5% acetic acid and then was dried by lyophilization. A portion of *N*-linked glycans was permethylated and analyzed by MALDI-TOF-MS.

*Cleavage of N-linked glycans by Exoglycosidases:* A portion of the *N*-linked glycans was dissolved in 0.05 M sodium citrate with 0.1 M NaCl buffer at pH 6.0 and treated with  $\alpha$ -2,3-Sialidase from Jack beans (Sigma) overnight at 37°C. The sample was dried in the speed vacuum centrifuge to change enzyme buffer.  $\beta$ -*N*-acetylhexosaminidase (pH 5.0) from Jack beans (Sigma) was added to the portion of sialidase digested sample and incubated for 5 days at 37°C in 0.1 M citrate phosphate buffer at pH 5.0. After enzyme digestion, the sample was dried and dissolved in 0.05 M sodium citrate buffer (pH 4.5). Another exoglycosidase,  $\alpha$ -1,6-mannosidase from *Xanthomonas manihotis* (New England BioLabs) was added to the sialidase and  $\beta$ -*N*-acetylhexosaminidase digested glycans. After the enzymatic digestions, each portion of the samples was lyophilized and permethylated. The carbohydrates were analyzed by MALDI-TOF-MS to monitor the enzyme digestions.

*Preparation of the O-permethylated carbohydrates:* The lyophilized carbohydrate fraction was dissolved in dimethylsulfoxide and then methylated with NaOH and methyl iodide as described by K. Aumula, *et al.*<sup>5</sup>

*Matrix-assisted laser-desorption ionization time-of-flight mass spectrometry (MALDI/TOF-MS):* Profiling of *N*-linked glycans was performed initially using MALDI/TOF-MS (4700 Proteomics analyzer, Applied Biosystems). Permethylated glycans were crystallized on a MALDI plate with 2, 3-dihydroxybenzoic acid (DHBA, 20mg/mL solution in 50% methanol: water) as a matrix. All spectra were acquired in the reflector positive ion mode and averaged spectra of 50 laser shots with a 337 nm nitrogen laser.

*Electrospray ionization – linear ion trap mass spectrometry (ESI-LCQ/MSn):* The structure of the oligosaccharides detected by MALDI-TOF MS was confirmed by LCQ-ESI MS (Thermo Finnigan) spectrometry, in the positive ion mode. The permethylated glycans were dried, re-dissolved in 50% methanol containing 1 mM NaOH, and infused directly into the LCQ-MS instrument at a constant flow rate of 1 $\mu$ L/min via a syringe pump (Harvard Apparatus) and sprayed at 3.5 kV. The capillary temperature was set to 200°C. A normalized collision energy of 35 and an isolation mass window of 2 Da were applied to obtain MSn described in detail by A. Lapadula, *et al.*<sup>6</sup>

*Glycosyl composition Analysis:* Glycosyl composition analysis of the released *N*-glycans from purified ST6Gal-1 glycoprotein by GC-MS showed fucose, galactose, mannose, *N*-acetylglucosamine, *N*-acetylneuraminic acid, and *N*-acetylgalactosamine. The glycosyl composition was performed by GC-MS in order to unambiguously determine if *N*-acetylgalactosamine was present in addition to the *N*-acetylglucosamine that was expected on the *N*-glycans.

*MALDI-MS and ESI-MS/MS analysis of permethylated released oligosaccharides:* The released and permethylated *N*-glycans from ST6Gal-1 were also analyzed by MALDI-MS (Figure 1A). More than ten oligosaccharides were detected in the spectrum, which consisted of various fucosylated and/or sialylated complex type biantennary and minor triantennary *N*-glycan structures. The structure of major glycans after sialidase digestion was confirmed by performing tandem mass spectrometry using ESI-MS/MS on the molecular ions and a series of exoglycosidase digestions. The main ions observed were *m/z* 3007.6 and 2792.5, which corresponded to compositions of biantennary structures Hex<sub>4</sub>HexNAc<sub>5</sub>NeuAc<sub>2</sub>Fuc<sub>1</sub> and Hex<sub>5</sub>HexNAc<sub>4</sub>NeuAc<sub>2</sub>, respectively. The structure of the ion *m/z* 2792.5 was confirmed to be a non-fucosylated disialylated biantennary glycan by exoglycosidase digestions and subsequent ESI-MS/MS analysis of exoglycosidase products (see Table 1 and Figure 1). For the ion *m/z* 3007.6, the presence of *N*-acetylgalactosamine in the glycosyl composition data by GC-MS and the Hex<sub>4</sub>HexNAc<sub>5</sub>NeuAc<sub>2</sub>Fuc<sub>1</sub> composition with five hexosamine residues in the MALDI-MS suggested a possible sialyl LacdiNAc sequence (Sia -GalNAc $\beta$ 1-4GlcNAc-R) at the non-reducing end. Figure 2 shows the ESI-MS/MS data of the parent ion, *m/z* 1154 (D.C. of *m/z* 2285) from the released *N*-glycans after  $\alpha$  2-3 Sialidase digestion. The presence of the fragment ion *m/z* 527.2 showing a HexNAc<sub>2</sub><sup>+</sup> ion and the y and b fragment ions from the *m/z* 1154 ion confirmed the presence of the HexNAc<sub>2</sub> residue at one of the biantennary arms. The presence of sialyl LacdiNAc (Sia2-6GalNAc $\beta$ 1-4GlcNAc $\beta$ 1-R) has previously been described by T. Ohkura *et al.*<sup>7</sup>

*Exoglycosidase digestions:* In order to confirm the glycan structures and determine the position of the LacdiNAc sequences (GalNAc $\beta$ 1-4GlcNAc) on the main glycan, the released *N*-glycans from ST6Gal-1 were subjected to a series of exoglycosidase digestions. Figure 1B shows the MALDI-MS spectrum of permethylated released *N*-glycans after  $\alpha$  2-3 sialidase treatment. The spectrum is greatly simplified compared to the intact glycan profile. The major ion *m/z* 2285 confirms loss of two sialic acids from the original ion *m/z* 3007 and corresponds to the Hex<sub>4</sub>HexNAc<sub>5</sub>Fuc<sub>1</sub> structure.

The MALDI-MS spectrum of the released *N*-glycans after  $\alpha$  2-3 sialidase followed by  $\beta$ -*N*-hexosaminidase digestion is shown in Figure 1C. The  $\beta$ -*N*-hexosaminidase digestion, which should only affect the oligosaccharides containing the

GalNAc-GlcNAc structures, resulted in ions  $m/z$  1621 and 1795 as products after removal of GalNAc-GlcNAc from their respective original ions,  $m/z$  2111 and 2285. As expected, the ions  $m/z$  2070, 2244, and 2519, which contained galactose at the non-reducing end, stayed unchanged after the  $\beta$ -*N*-hexosaminidase digestion.

In order to determine which arm the GalNAc $\beta$ 1-4GlcNAc moiety was attached in the biantennary structure, the product of the  $\beta$ -*N*-hexosaminidase digestion was subjected to  $\alpha$  1-6 mannosidase digestion. If the GalNAc-GlcNAc was originally attached through the 6-linked mannose then removal of HexNAc<sub>2</sub> after  $\beta$ -*N*-hexosaminidase and subsequent digestion with  $\alpha$  1-6 mannosidase should result in loss of one mannose residue and detection of the ions  $m/z$  1417 and 1591. Figure 1D shows the MALDI-MS spectrum of the product of the above exoglycosidases after  $\alpha$  1-6 mannosidase digestion. The lack of the ions at  $m/z$  1417 and 1591 suggests that the GalNAc-GlcNAc is probably not on the  $\alpha$  1,6 arm and is possibly attached through the  $\alpha$ 1, 3- mannose residue. However, more experiments with will be needed to confirm this.

**Conclusion:** In conclusion, the major *N*-glycan structure on the ST6Gal-1 glycoprotein was determined to be a fucosylated biantennary oligosaccharide with a Sia2-3/6GalNAc $\beta$ 1-4GlcNAc attached through the  $\alpha$ 1, 3-mannose residue. The other main *N*-glycan structure was a disialylated biantennary glycan.

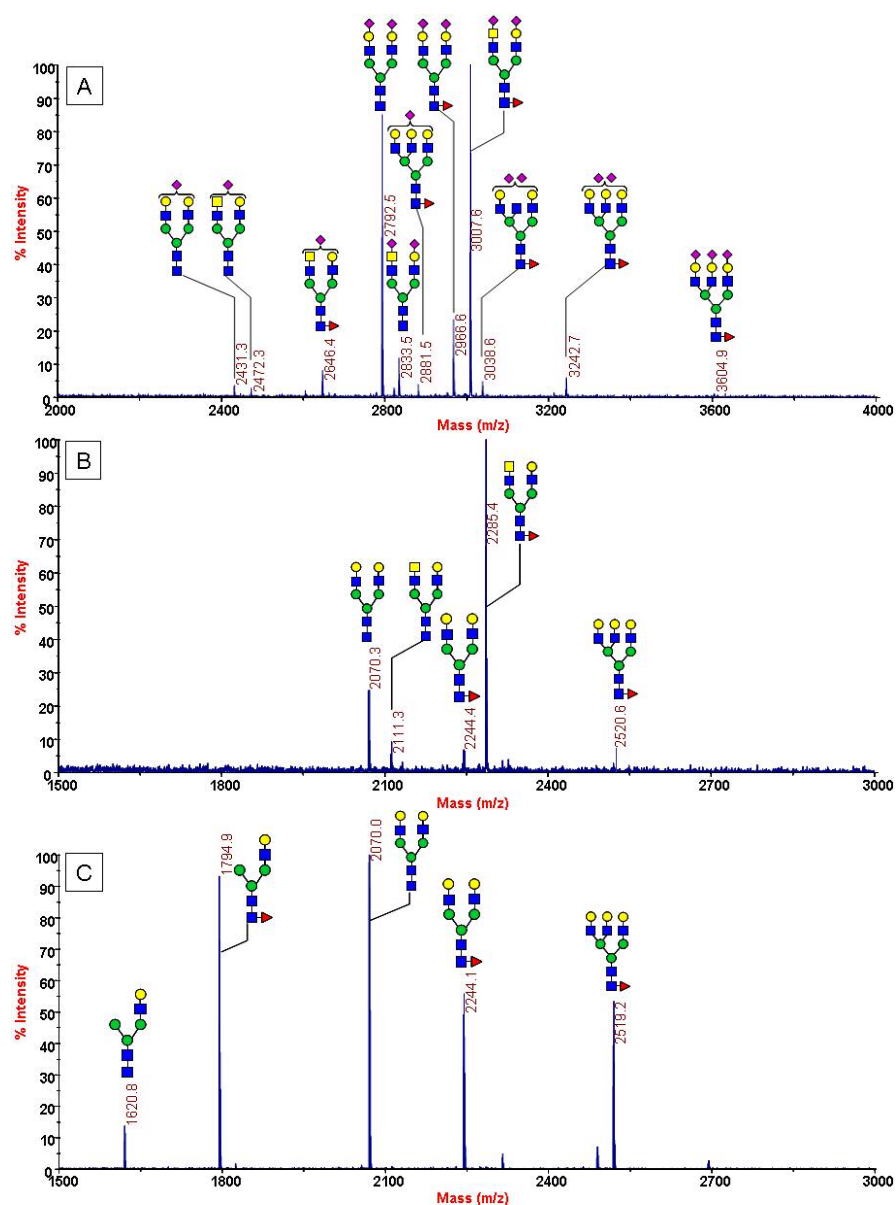

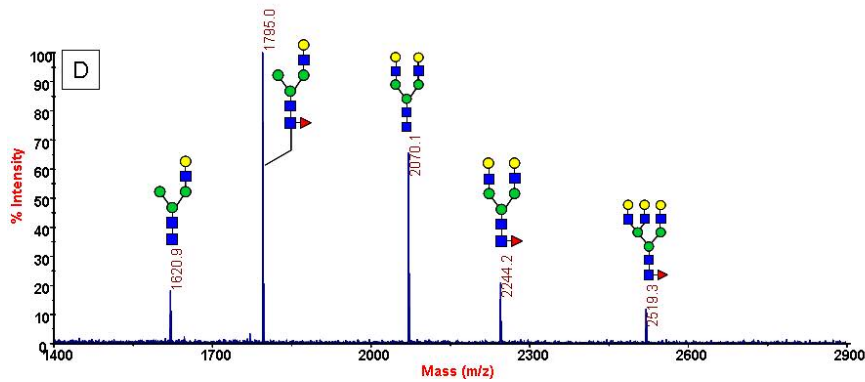

Figure 1. MALDI-TOF MS of the major released *N*-linked glycans from ST6Gal-I and of the products of exoglycosidase digests. (A) Intact glycans released from ST6Gal-I with PNGase F were permethylated and analyzed. Structural assignments are based on fragmentation (MS/MS) by ESI-LCQ (data are not presented). (B) Incubation with  $\alpha$  2-3 sialidase produced intact biantennary structures that were devoid of sialic acids. (C) The full MALDI-MS spectrum of ST6Gal-I permethylated *N*-linked glycans after  $\alpha$  2-3 sialidase and  $\beta$ -*N*-hexosaminidase digestions. (D) The full MALDI-MS spectrum of ST6Gal-I permethylated *N*-linked glycans after  $\alpha$  2-3 sialidase,  $\beta$ -*N*-hexosaminidase, and  $\alpha$  1-6 mannosidase digestions.

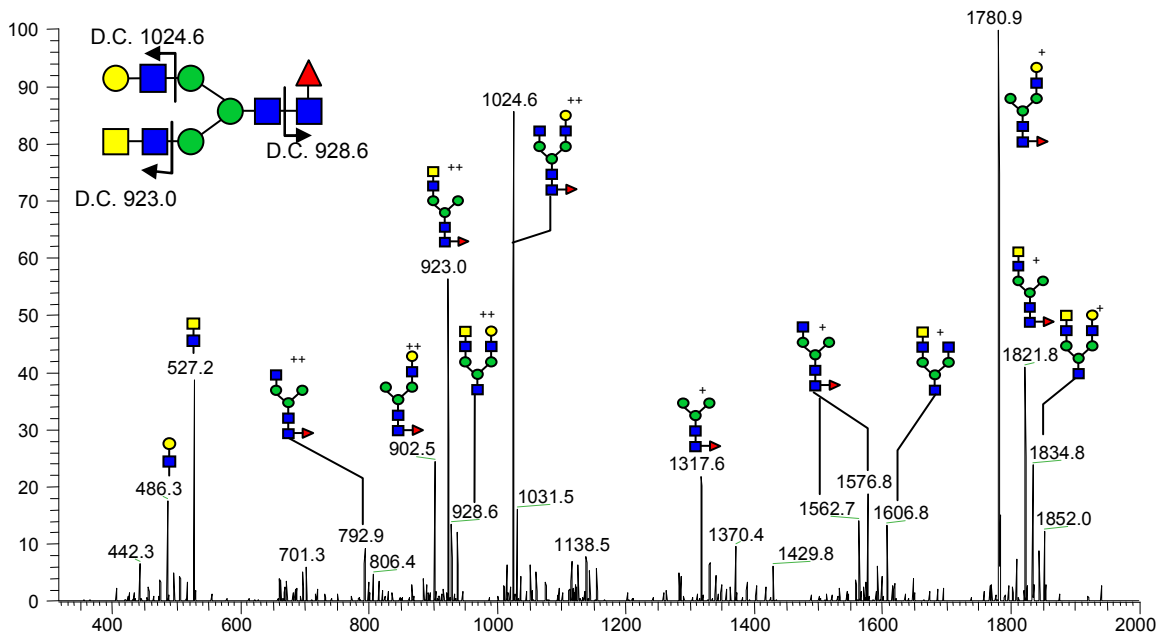

Figure 2. The ESI-MS/MS spectrum of permethylated *N*-glycans from ST6Gal-I parent ion, *m/z* 1154 (doubly charged of *m/z* 2285) after  $\alpha$  2-3 Sialidase treatment.

Table 1. The molecular ions observed by MALDI-MS of the released and permethylated *N*-glycans after  $\alpha$ -2,3-sialidase digestions and the subsequent ESI-MS/MS fragments detected.

| Observed Mass |               | Composition                          | Proposed structure |
|---------------|---------------|--------------------------------------|--------------------|
| Single Charge | Double Charge |                                      |                    |
| 2070.3        | 1046.7        | HEX <sub>3</sub> HEXNAC <sub>4</sub> | D.C. 814.9<br>     |

|        |        |                                                        |                                                                                                                                      |
|--------|--------|--------------------------------------------------------|--------------------------------------------------------------------------------------------------------------------------------------|
| 2111.3 | 1067.5 | HEX <sub>4</sub> HEXNAC <sub>5</sub>                   | 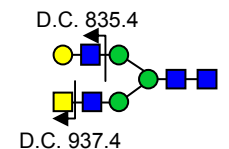 <p>D.C. 835.4<br/>D.C. 937.4</p>                 |
| 2285.4 | 1154.1 | HEX <sub>4</sub> DHEX <sub>1</sub> HEXNAC <sub>5</sub> |  <p>D.C. 923.0<br/>D.C. 1024.6<br/>D.C. 928.6</p> |
| 1794.9 | 909.2  | HEX <sub>4</sub> DHEX <sub>1</sub> HEXNAC <sub>3</sub> |  <p>S.C. 1332.6<br/>S.C. 1343.4</p>               |
| 1620.8 | 822.2  | HEX <sub>4</sub> HEXNAC <sub>3</sub>                   |  <p>S.C. 1157.6<br/>S.C. 1343.6</p>               |

### Chemical shifts for observed NeuAc species

| Compound                  | H <sub>3eq</sub> (ppm) | H <sub>3ax</sub> (ppm) | C <sub>3</sub> (ppm) |
|---------------------------|------------------------|------------------------|----------------------|
| α-NeuAc                   | 2.73                   | 1.63                   | 43.4                 |
| β-NeuAc                   | 2.21                   | 1.84                   | 42.1                 |
| CMP-β-NeuAc               | 2.49                   | 1.66                   | 43.9                 |
| α-NeuAc bound to ST6Gal-I | 2.68                   | 1.72                   | 42.8                 |

Conditions: 10 mM potassium phosphate, 200 mM NaCl, pH 6.5, D<sub>2</sub>O, 37°C

#### References:

- (1) Heidlas, J. E.; Lees, W. J.; Pale, P.; Whitesides, G. M. *J. Org. Chem.*, **1992**, *57*, 146-151.
- (2) Aubin Y. ; Prestegard J. H. *Biochem.* **1993**, *32*, 3422-3428.
- (3) Weinstein, J.; Lee, E. U.; McEntee, K.; Lai, P. H.; Paulson, J. C. *J. Biol. Chem.* **1987**, *262*, 17735-17743.
- (4) Merkle, R. K.; Poppe, I. *Methods in Enzymology* **1994**, *230*, 1-15.
- (5) Anumula, K. R.; Taylor, P. B. *Anal. Biochem.*, **1992**, *203*, 101-108.
- (6) Lapadula, A. J.; Hatcher, P. J.; Hanneman, A. J.; Ashline D. J.; Zhang, H.; Reinhold V. N. *Anal. Chem.* **2005**, *77*, 6271-6279.
- (7) Ohkura, T.; Seko, A.; Hara-Kuge, S.; Yamashita, K. *J. Biochem.* **2002**, *132*, 891-901.
